# Supplementary material for: Hexagonal cluster Mn-MOF nanoflowers with super-hydrophilic properties for efficient and continuous solar-driven clean water production
Source: Royal Society of Chemistry journal article supplement (doi:10.1039/d0se01792b), 2021-01-01
Supplement: d0se01792b1.pdf [file d0se01792b1.pdf]

## Supporting Information

### Hexagonal cluster Mn-MOF nanoflowers with super-wetting surface area for efficient and continuous solar-driven clean water production

Jiulong Wang,<sup>a</sup> Weike Wang,<sup>\*a</sup> Xueyang Mu,<sup>a</sup> Zhengtong Li,<sup>a</sup> Chengbing Wang<sup>\*ab</sup>

<sup>a</sup>School of Materials Science and Engineering, Shaanxi Key Laboratory of Green Preparation and Functionalization for Inorganic Material, Shaanxi University of Science & Technology, Xi'an, Shaanxi 710021, P. R. China.

<sup>b</sup>Zhejiang Wenzhou Research Institute of Light Industry, Wenzhou 325003, Zhejiang, China.

\*Corresponding authors.

E-mail addresses: wangweike@sust.edu.cn, wangchengbing@gmail.com

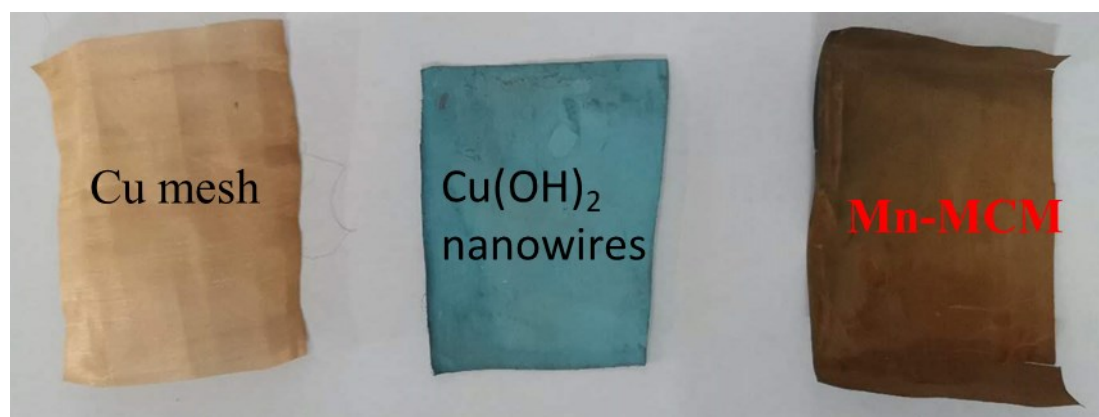

Fig. S1. The physical images of Mn-MCM being prepared.

The preparation of Mn-MCM is very simple and can be obtained in two steps, that is, growing copper hydroxide ( $\text{Cu}(\text{OH})_2$ ) nanowires on a copper mesh, and in the second step, growing Mn-dobdc on the  $\text{Cu}(\text{OH})_2$  nanowires by hydrothermally reaction, and finally obtaining the Mn-MCM.

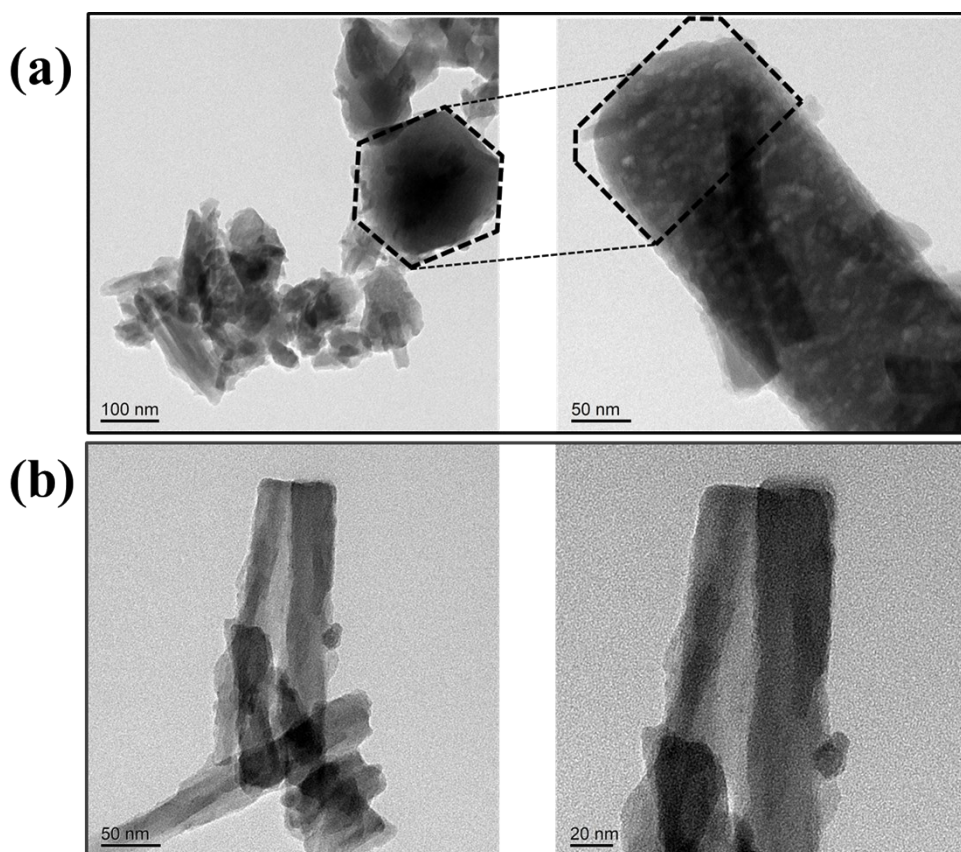

Fig. S2. TEM images of Mn-MCM. (a) Top-view and side-view TEM images of Mn-MCM with hexagonal prism structure at different magnifications. (b) TEM images of Mn-MCM with hexagonal prism cluster structure under different magnifications.

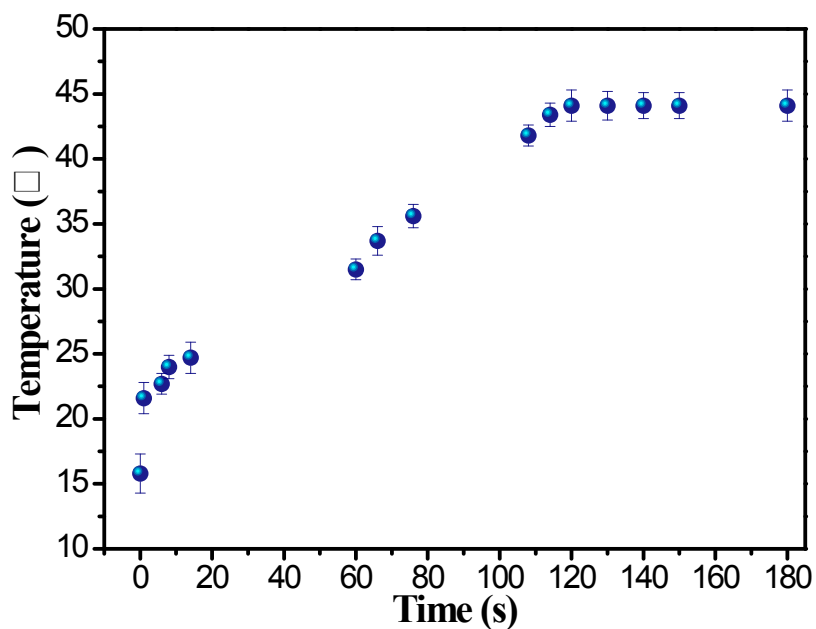

Fig. S3. The surface temperatures variation of Mn-MCM with time.

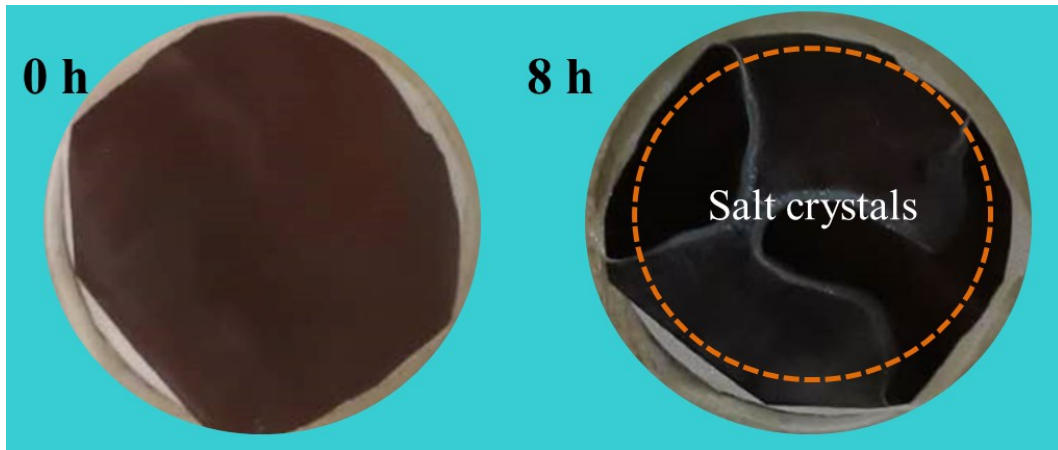

Fig. S4. The physical images before and after 8 h of the evaporation experiment of Mn-MCM.

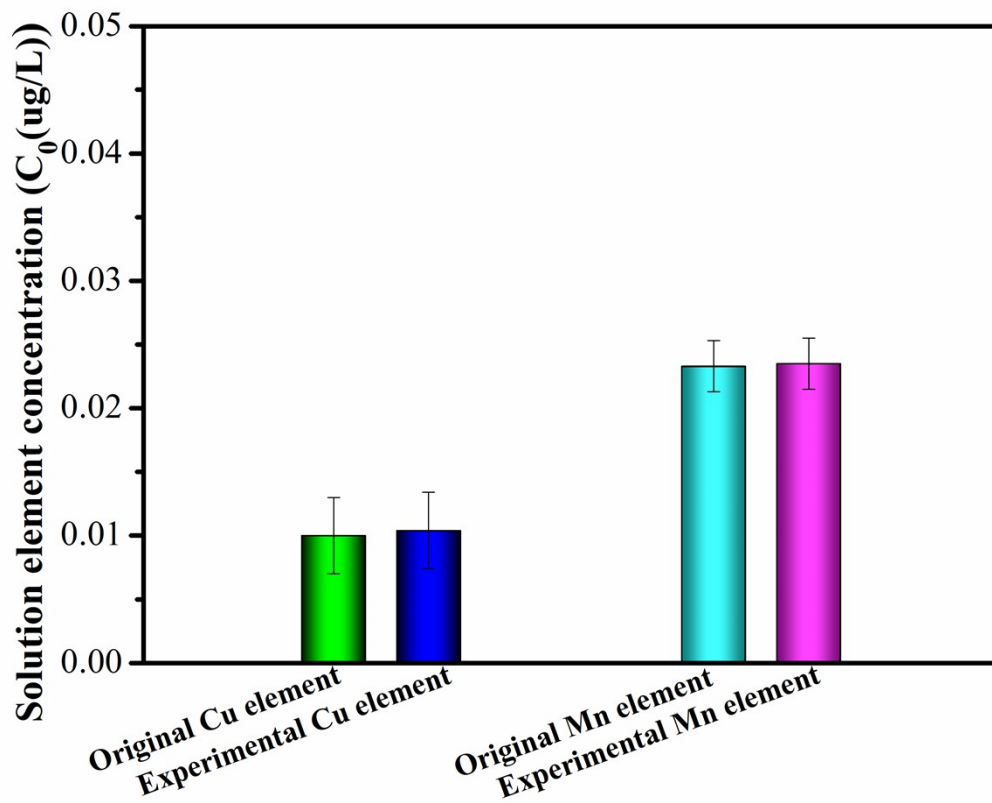

Fig. S5. The concentrations change of Cu element and Mn element in the solution (brine) before and after the evaporation experiment.

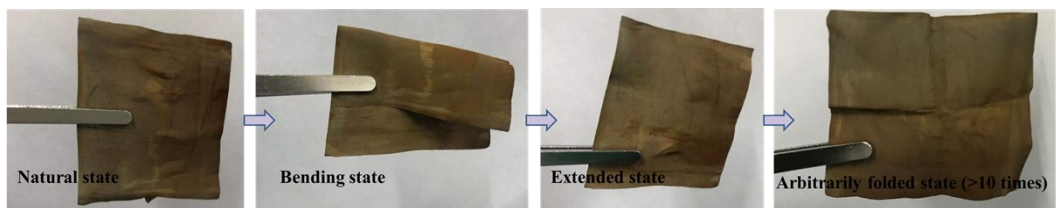

Fig. S6. The physical images of Mn-MCM before and after bending.

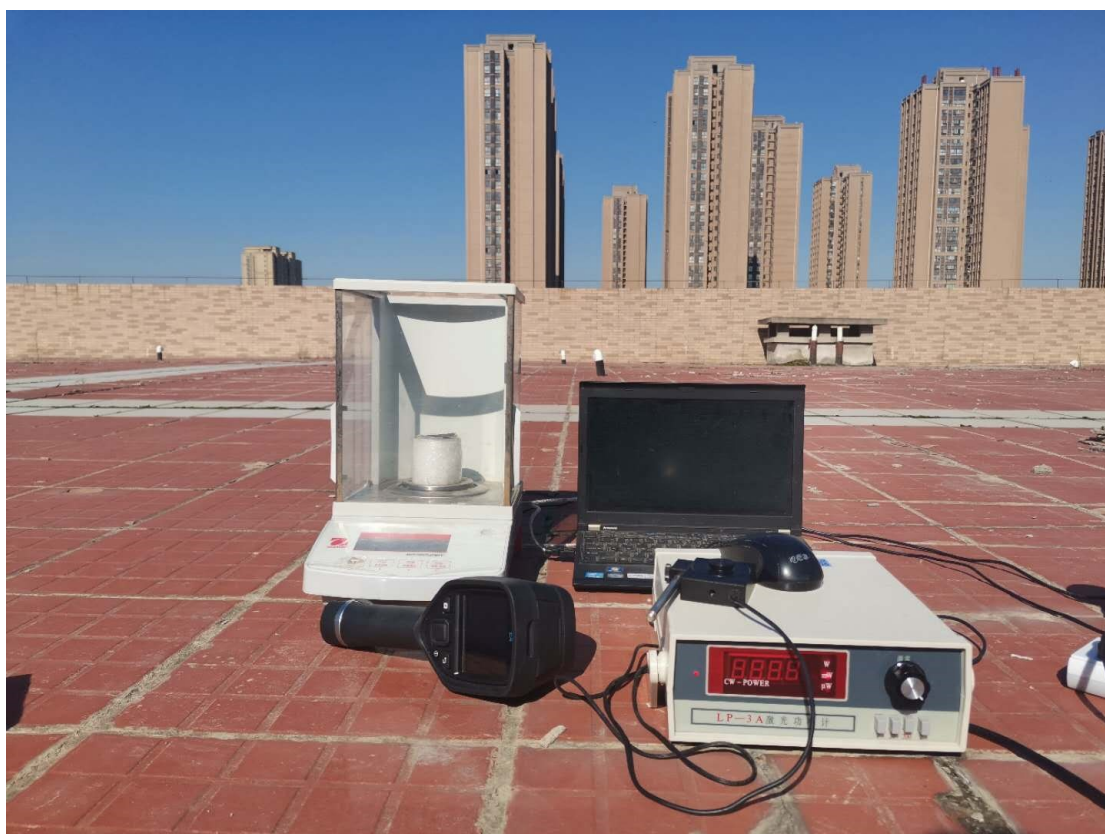

Fig. S7. The physical image of the experimental data acquisition instrument in the outdoor experiment.



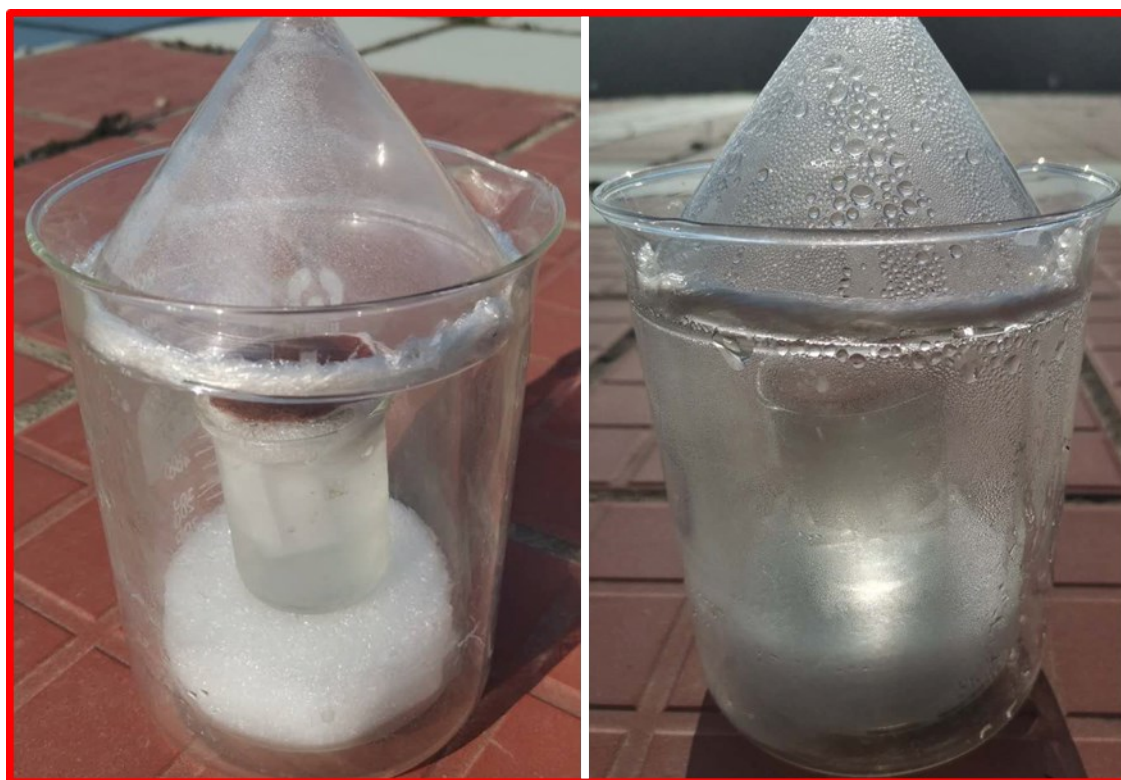

Fig. S8. The fresh water collection device based on Mn-MCM under natural light.

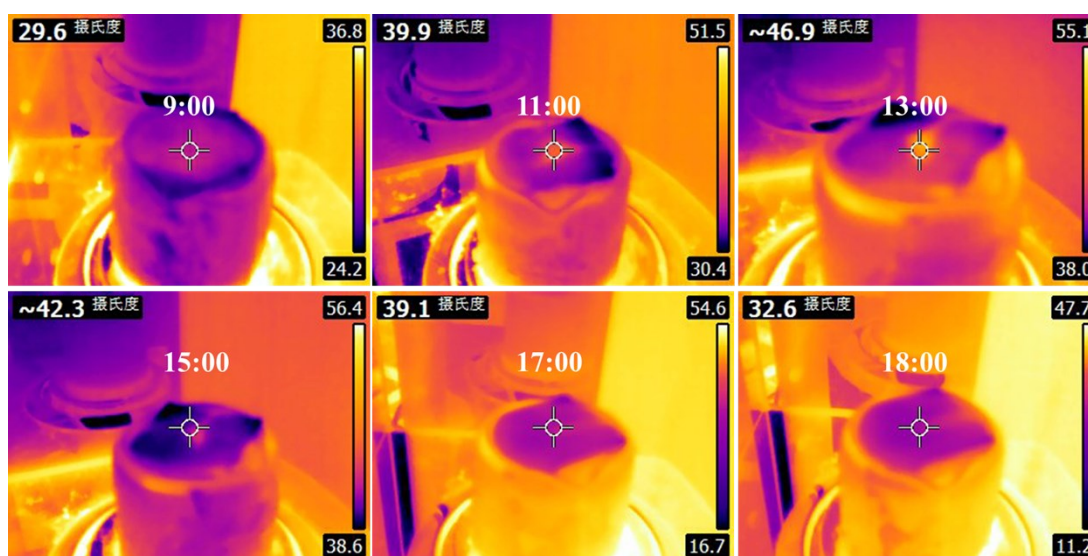

Fig. S9. The infrared images of the surface temperature of Mn-MCM with time under natural light.

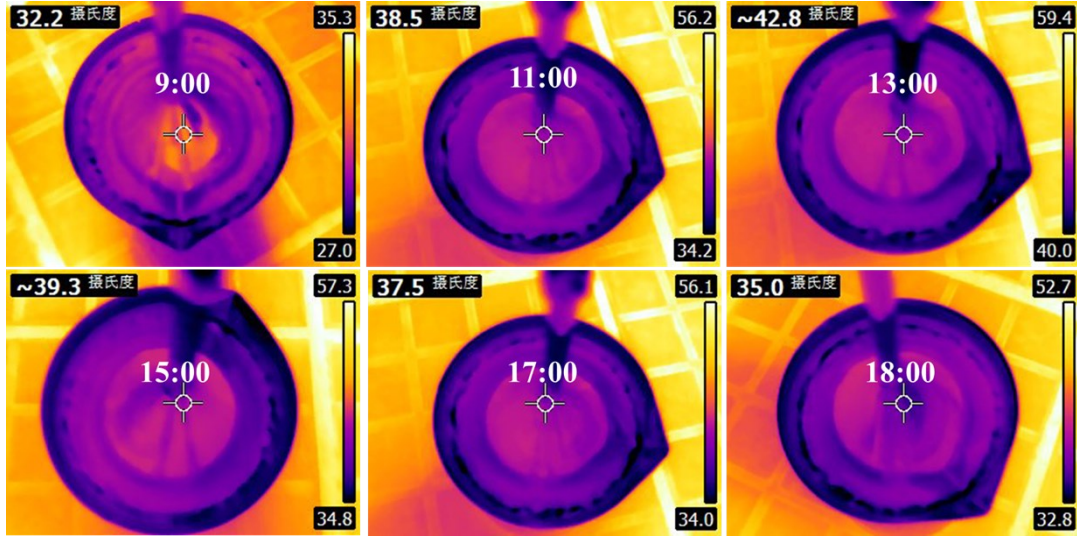

Fig. S10. Infrared camera images of the outdoor fresh water collection device under different time (Top view).

### Section S1. Steady-state energy balance analysis:

The input heat flux ( $J_{in}$ ) is  $1 \text{ kW/m}^2$ , and five main strategies for energy consumption are as follows: (1) water evaporation, (2) reflection and transmission energy loss, (3) conductive heat loss from the Mn-MCM to the water, (4) radiation heat loss from the Mn-MCM to the environment, and (5) convection heat loss from the Mn-MCM to the environment.

#### (1) Water evaporation consumption $\theta_1$

The water evaporation consumption rate is equal to the evaporation efficiency; thus,  $\theta_1$  is about 81.5%

#### (2) Reflection loss and transmission loss $\theta_2$

Detected by UV spectrophotometer, the reflectance and transmittance of Mn-MCM are 12.51% and 1.15%; thus, the reflection loss,  $\theta_2$  is 13.66%.

#### (3) Conduction loss $\theta_3$

$$\theta_3 = (J_{cond} / J_{in}) \cdot (A_{evaporator} / A_{system})$$

The conductive heat flux from evaporator composed of Mn-MCM and polyvinyl chloride foam to water is calculated as  $J_{cond} = k \cdot (\Delta T / L)$  (Fourier's law),  $k$  is the thermal conductivity of the evaporator ( $0.05 \text{ W m}^{-1} \text{ K}^{-1}$ ), and  $\Delta T / L$  is the gradient of

temperature of Mn-MCM as measured by IR camera and thermocouple which is about 160 K/m. The picture (Fig. S11) illustrates the Mn-MCM surface area is major conductive path and the system area is absorbing the input solar energy. After several statistical calculations,  $A_{evaporator}/A_{system}$  is about 0.77. Thus, we can calculate that  $\theta_3$  is about 0.6%.

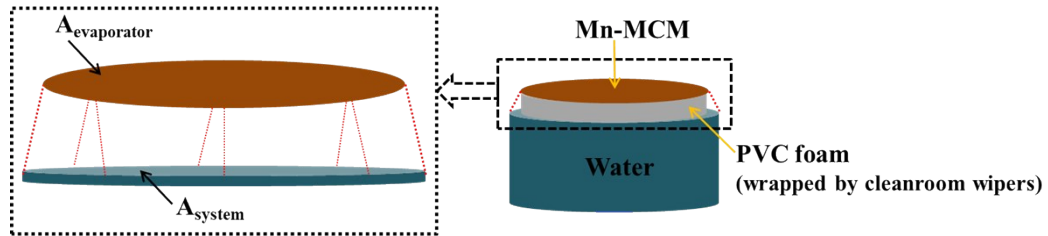

Fig. S11. The picture of evaporation system mode and fitting area for energy balance calculation.

#### (4) Radiation loss $\theta_4$

$$\theta_4 = (J_{rad} / J_{in}) \cdot (A_{evaporator} / A_{system})$$

The radiation flux can be calculated by  $J_{rad} = \varepsilon \sigma (T_1^4 - T_2^4)$  (Stefan-Boltzmann law),  $\varepsilon$  is the emissive rate which is calculated using an absorption spectrum and plank formula as 0.71,  $\sigma$  is the Stefan-Boltzmann constant ( $5.67 \times 10^{-8} \text{ W m}^{-2} \text{ K}^{-4}$ ),  $T_1$  is the temperature of the absorber (the average surface temperature of Mn-MCM is about 309.75 K at  $1 \text{ kw m}^{-2}$ ),  $T_2$  is the ambient temperature (298.15 K). Thus, we can calculate that  $\theta_4$  is about 4.04%.

#### (5) Convection loss $\theta_5$

$$\theta_5 = (P_{conv} / J_{in}) \cdot (A_{evaporator} / A_{system})$$

The convection heat loss can be calculated by  $P_{conv} = h A_{surface} \Delta T$  (Newton's law of cooling),  $h$  is the convection heat transfer coefficient which can obtain by reference ( $5 \text{ W m}^{-2} \text{ K}^{-1}$ ) [1], the  $A_{surface}$  is  $0.00138474 \text{ m}^2$ , the rest of the parameters remain the same as before. ( $\Delta T = T_1 - T_2 = 11.6 \text{ K}$ ). Thus, we can calculate that  $\theta_4$  is about 0.

In addition to these five main energy consumption parts ( $81.5\% + 13.66\% + 0.6\% + 4.04\% + 0\% \approx 99.76\%$ ), the incoming solar energy may be dissipated by the test system or other ways.

**Table S1** The evaporation performance of Mn-MCM was compared with other materials.

| Materials                                        | Evaporation rate<br>(kg m <sup>-2</sup> h <sup>-1</sup> ) | Evaporation Efficiency (%) | References |
|--------------------------------------------------|-----------------------------------------------------------|----------------------------|------------|
| Mn-MOF-based copper mesh (Mn-MCM)                | 1.31 @ 1 sun                                              | 81.5% @ 1 sun              | This paper |
| MDPC/SS mesh                                     | 1.222 @ 1 sun                                             | 84.3% @ 1 sun              | [2]        |
| Washable nonwoven photothermal cloth             | 1.24 @ 1 sun                                              | 83.1% @ 1 sun              | [3]        |
| 2D Ti <sub>3</sub> C <sub>2</sub> MXene membrane | 1.31 @ 1 sun                                              | 71% @ 1 sun                | [4]        |
| Layer-by-layer 3D-printed evaporator             | 1.25 @ 1 sun                                              | 85.6% @ 1 sun              | [5]        |
| MoO <sub>x</sub> HNS membrane                    | 1.255 @ 1 sun                                             | 85.6% @ 1 sun              | [6]        |
| Polypyrrole coated cotton fabric                 | 1.2 @ 1 sun                                               | 82.4% @ 1 sun              | [7]        |
| All-nanofiber aerogel                            | 1.11 @ 1 sun                                              | 76.3% @ 1 sun              | [8]        |
| Artificial tree with a reversed design           | 1.08 @ 1 sun                                              | 74% @ 1 sun                | [9]        |
| Fe <sub>3</sub> O <sub>4</sub> @C film           | 1.07 @ 1 sun                                              | 67% @ 1 sun                | [10]       |
| CuS/PE membrane                                  | 1.021 @ 1 sun                                             | 63.9% @ 1 sun              | [11]       |
| Mxene/polyvinylidene fluoride                    | 1 @ 1 sun                                                 | 84% @ 1 sun                | [12]       |

## References

- [1] H. Ghasemi, G. Ni, A. M. Marconnet, J. Loomis, S. Yerci, N. Miljkovic, G. Chen, *Nat. Commun.*, 2014, **5**, 4449.
- [2] S. N. Ma, W. Qarony, M. I. Hossain, C. T. Yipc, Y. H. Tsang, *Sol. Energy Mater. Sol. Cells*, 2019, **196**, 36-42.
- [3] Y. Jin, J. Chang, Y. Shi, L. Shi, S. Hong, P. Wang, *J. Mater. Chem. A*, 2018, **6**, 7942-7949.
- [4] J. Q. Zhao, Y. W. Yang, C. H. Yang, Y. P. Tian, Y. Han, J. Liu, X. T. Yin, W. X. Que, *J. Mater. Chem. A*, 2018, **6**, 16196-16204.
- [5] Y. Li, T. Gao, Z. Yang, C. Chen, W. Luo, J. Song, E. Hitz, C. Jia, Y. Zhou, B. Liu, B. Yang, L. Hu, *Adv. Mater.*, 2017, **29**, 1700981.



- [6] Q. C. Lu, Y. Yang, J. R. Feng, X. Wang, *Sol. RRL*, 2019, **3**, 1800277.
- [7] D. D. Hao, Y. D. Yang, B. Xu, Z. S. Cai, *Appl. Therm. Eng.*, 2018, **141**, 406-412.
- [8] F. Jiang, H. Liu, Y. Li, Y. Kuang, X. Xu, C. Chen, H. Huang, C. Jia, X. Zhao, E. Hitz, Y. Zhou, R. Yang, L. Cui, L. Hu, *Acs Appl Mater Interfaces*, 2019, **9**, 1802158.
- [9] H. Liu, C. Chen, G. Chen, Y. Kuang, X. Zhao, J. Song, C. Jia, X. Xu, E. Hitz, H. Xie, S. Wang, F. Jiang, T. Li, Y. Li, A. Gong, R. Yang, S. Das, L. Hu, *Adv. Energy Mater.*, 2018, **8**, 1701616.
- [10] R. Chen, K. H. Zhu, Q. M. Gan, Y. Q. Yu, T. Q. Zhang, X. W. Liu, M. M. Ye, Y. D. Yin, *Mater. Chem. Front.*, 2017, **1**, 2620-2626.
- [11] M. Y. Shang, N. Li, S. D. Zhang, T. T. Zhao, C. Zhang, C. Liu, H. F. Li, Z. Y. Wang, *ACS Appl. Energy Mater*, 2017, **1**, 56-61.
- [12] R. Li, L. Zhang, L. Shi, P. Wang, *ACS Nano.*, 2017, **11**, 3752.
